# Supplementary material for: MicroRNA-185 and 342 Inhibit Tumorigenicity and Induce Apoptosis through Blockade of the SREBP Metabolic Pathway in Prostate Cancer Cells
Source: PubMed Central journal article supplement (PMC3739799; doi:10.1371/journal.pone.0070987), 2013-08-09

**Figure S2**

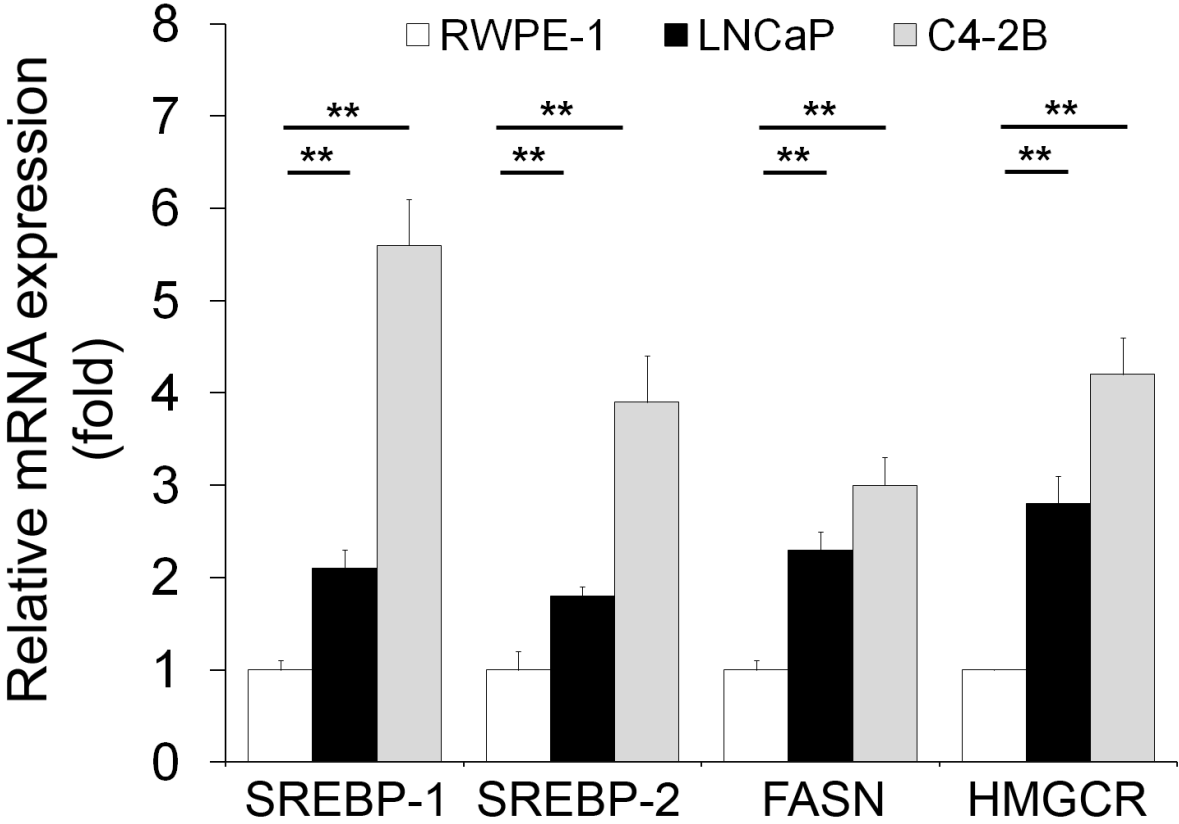

Supplement: pone.0070987.s002.pdf [file pone.0070987.s002.pdf]
