# Supplementary material for: MicroRNA-185 and 342 Inhibit Tumorigenicity and Induce Apoptosis through Blockade of the SREBP Metabolic Pathway in Prostate Cancer Cells
Source: PubMed Central journal article supplement (PMC3739799; doi:10.1371/journal.pone.0070987), 2013-08-09
Supplement: pone.0070987.s004.pdf [file pone.0070987.s004.pdf]

**Supplementary Table S1. The sequences of primers used for qPCR.**

| Gene     |         | Sequence (5' to 3')      |
|----------|---------|--------------------------|
| SREBP-1a | Forward | GGAGGGGTAGGGCCAACGGCCT   |
|          | Reverse | CATGTCTTCGAAAGTGCAATCC   |
| SREBP-2  | Forward | CCCCTGACTTCCCTGCTGCA     |
|          | Reverse | GCGCGAGTGTGGCCGGATC      |
| FASN     | Forward | CGGTACGCGACGGCTGCCTG     |
|          | Reverse | GCTGCTCCACGAACTCAAACACCG |
| HMGCR    | Forward | GTCATTCCAGCCAAGGTTGT     |
|          | Reverse | GGGACCACTTGCTTCCATTA     |
| AR       | Forward | GCCTTGCTCTCTAGCCTCAA     |
|          | Reverse | GTCGTCCACGTGTAAGTTGC     |
| 18S rRNA | Forward | GCTTAATTTGACTCAACACGGGA  |
|          | Reverse | AGCTATCAATCTGTCAATCCTGTC |
| GAPDH    | Forward | GACAACAGCCTCAAGATCATCAG  |
|          | Reverse | ATGGCATGGACTGTGGTCATGAG  |
